# Supplementary material for: Structure evolution and SERS activation of cuprous oxide microcrystals via chemical etching
Source: Royal Society of Chemistry journal article supplement (doi:10.1039/c3ta11395g), 2013-01-01
Supplement: c3ta11395g.pdf [file c3ta11395g.pdf]

## Supporting Information

### Structure Evolution and SERS Activation of Cuprous Oxide Microcrystals via Chemical Etching

Chao Qiu, Ying Bao, Nathan L. Netzer, and Chaoyang Jiang\*

Department of Chemistry, University of South Dakota, Vermillion, South Dakota 57069

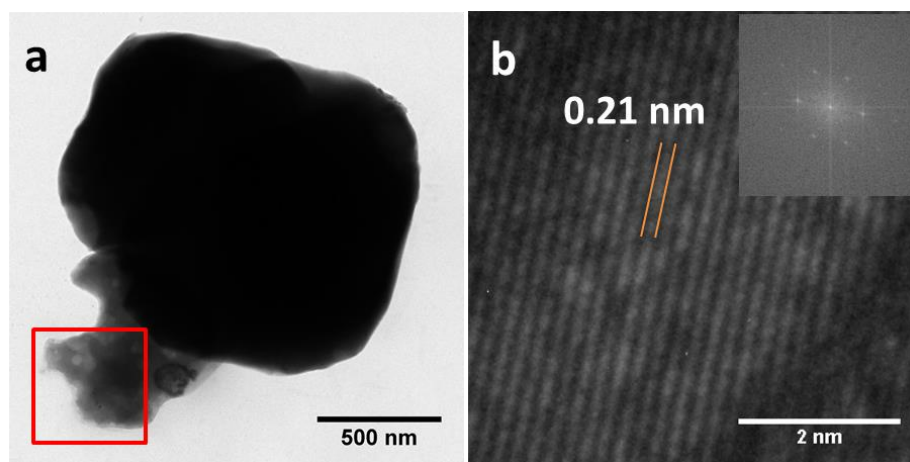

Figure S1. TEM image (a) of Cu<sub>2</sub>O microcrystal which etched by NH<sub>3</sub>·H<sub>2</sub>O (pH=11.7) for 20 min. (b) HRTEM image corresponding to area in (a).

### LB Film Preparation

A solvent exchange method was used to disperse Cu<sub>2</sub>O microparticles into chloroform. Briefly, centrifugation at 3,000 rpm was utilized for 3 minutes to precipitate the Cu<sub>2</sub>O microparticles from the storage solvent (methanol). Then the precipitation was re-dispersed into chloroform to form a uniform dispersion. Glass and silicon substrates were cleaned using piranha solution (3:1 concentrated sulfuric acid to 30% hydrogen peroxide). These substrates were rendered hydrophilic and used in transferring the Cu<sub>2</sub>O microparticle monolayer from the air/water interface to a solid state LB thin film.

All the LB experiments are performed using a KSV 2000 system equipped with a Teflon trough that has a total subphase volume of 1172 mL with a surface area of 870 cm<sup>2</sup> (L580 x W150 x D9 mm<sup>3</sup>), a dipping well (L37 x W117 x D90 mm<sup>3</sup>), and a platinum Wilhelmy plate. In a typical experiment, 3.0 mL of Cu<sub>2</sub>O microparticle solution is deposited drop wise onto the subphase using a 100 μL pipette. To obtain the LB films with a highly density of Cu<sub>2</sub>O microcrystals, Teflon coated barriers were used to compress the Cu<sub>2</sub>O microcrystal monolayer at a speed of 2 mm/min until the desired surface pressure is

reached (50 mN/m). The LB thin film is then transferred from the air/water interface to the solid substrate using a robotic dipper at 1 mm/min.

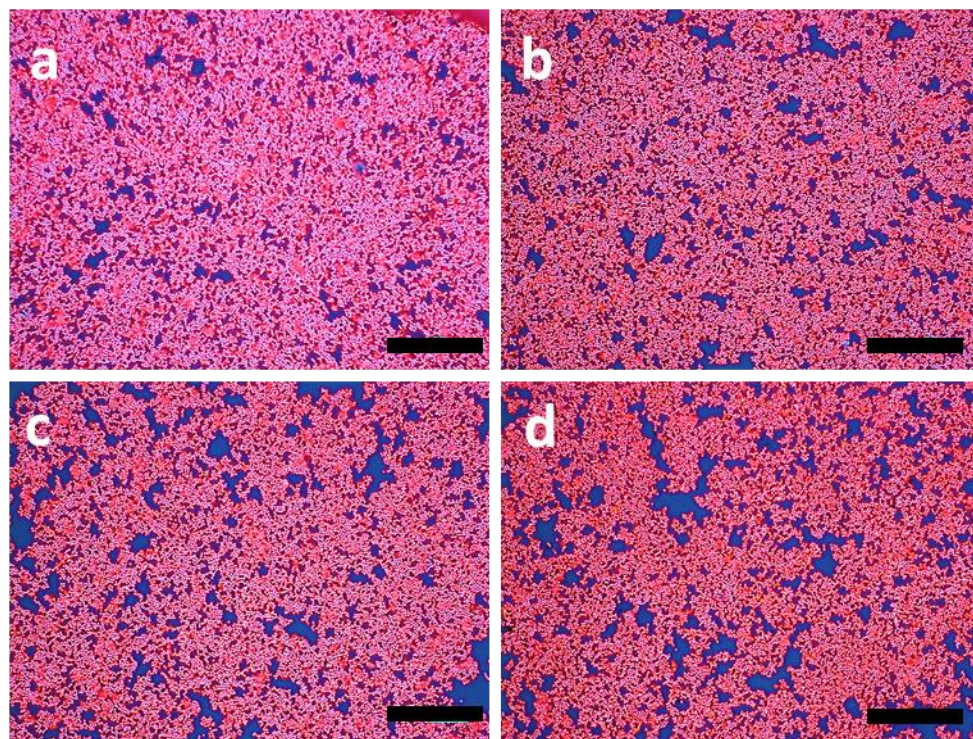

Figure S2. Digital photographic images of Cu<sub>2</sub>O microcrystal LB films (a), (b), (c), and (d), in different etched (pH=11.7) periods: 0, 5 min, 10 min, and 15 min, respectively. Scale bar is 50 μm.

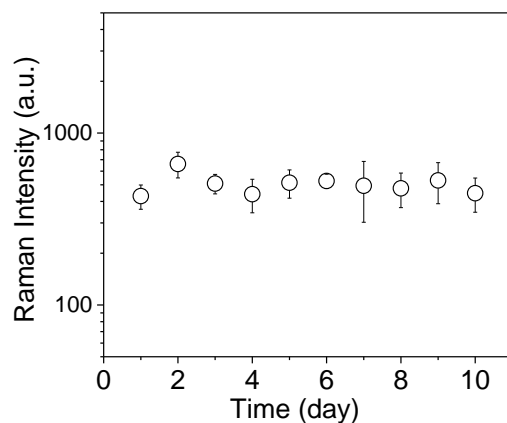

Figure S3. Stability study on Cu<sub>2</sub>O microparticle thin films for their SERS performance. Before each Raman spectrum carried on, 4-ATP molecules solution was loaded.
